# Supplementary material for: Charge-specific size-dependent separation of water-soluble organic molecules by fluorinated nanoporous networks
Source: PubMed Central journal article supplement (PMC5109553; doi:10.1038/ncomms13377), 2016-11-10
Supplement: ncomms13377-s1.pdf [file ncomms13377-s1.pdf]

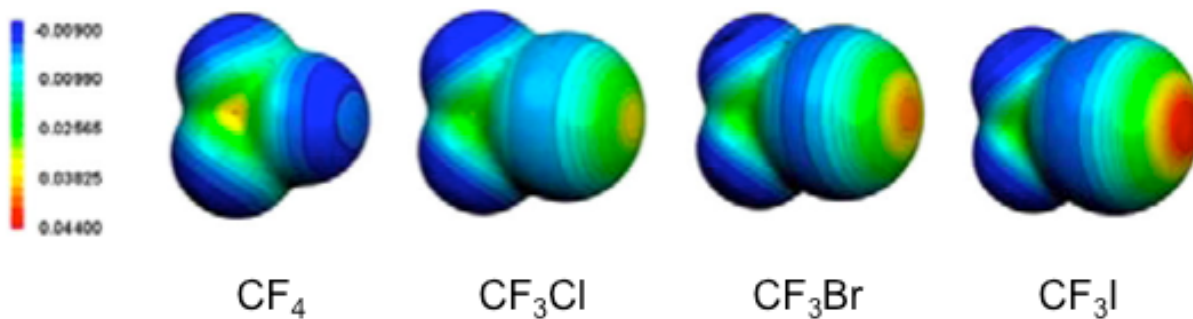

**Supplementary figure 1 | Molecular electrostatic potential surface of  $\text{CF}_3\text{X}$ .**

Reprinted with permission from Supplementary Reference #4. Copyright 2007 Springer.

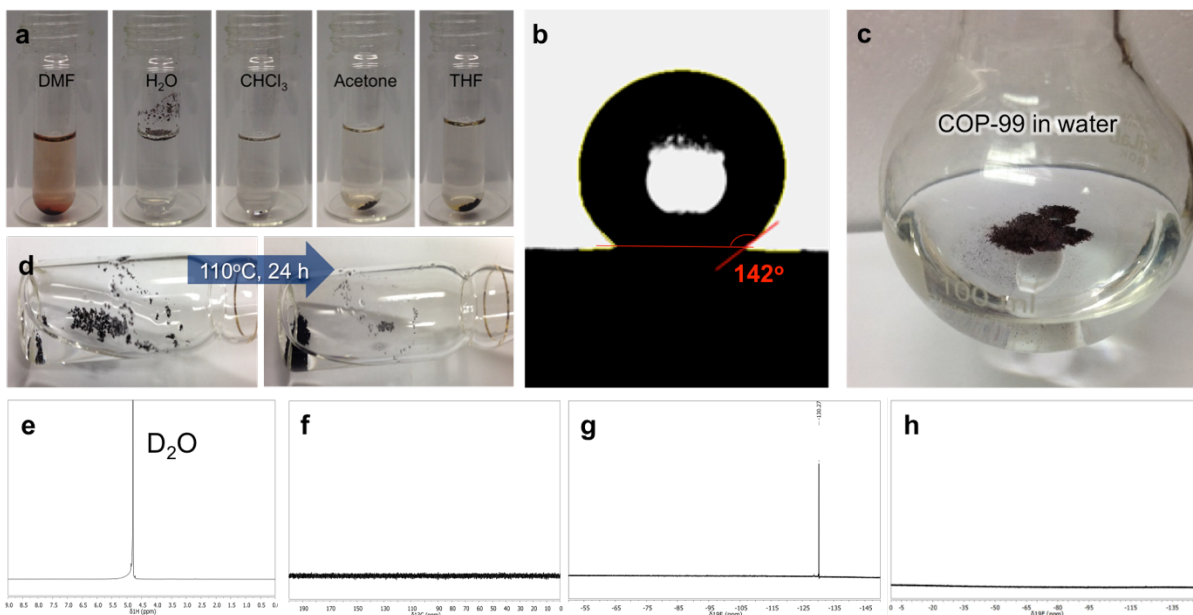

**Supplementary figure 2 | Stability tests for COP-99.** (a) Solubility test of COP-99 in common solvents. Images were taken after a sonication for 1 min at 50 °C. (b) Contact angle for a water droplet on the surface of COP-99. (c) Photograph of COP-99 in water. Owing to the hydrophobicity, COP-99 floats on the surface of water. (d) Long-term boiling test of COP-99 (20 mg) in D<sub>2</sub>O (1.5 mL) at 110°C for 24 h. In order to prevent D<sub>2</sub>O evaporation, the test was conducted in a sealed glass ampoule. There was no noticeable change in both COP-99 and D<sub>2</sub>O solution after boiling. (e) <sup>1</sup>H and (f) <sup>13</sup>C NMR spectrum of the D<sub>2</sub>O filtrate. (g) <sup>19</sup>F NMR spectrum of D<sub>2</sub>O the filtrate exhibited the existence of free fluorine partially detached from COP-99 via nucleophilic substitution. (h) Fluorine peak was not observed when the COP-99 was treated in D<sub>2</sub>O at 50 °C for 60 h.

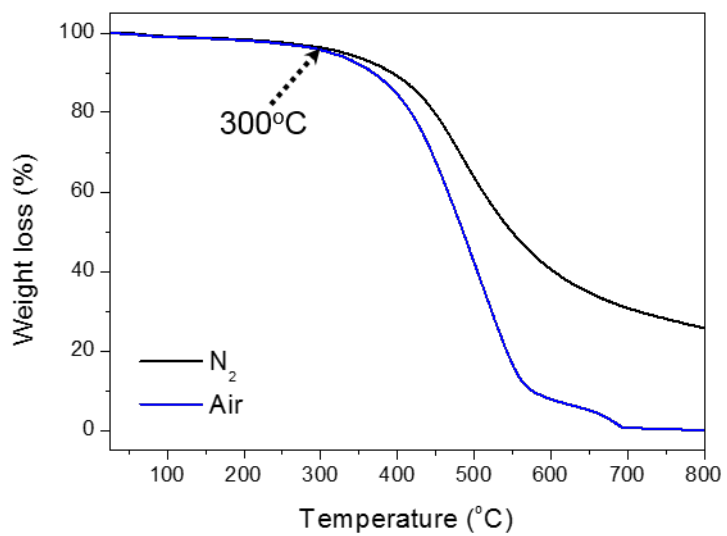

**Supplementary figure 3 | Thermogravimetric analysis (TGA) plot of COP-99.** COP-99 shows high thermal stability up to 300°C both in inert and oxidative environments.

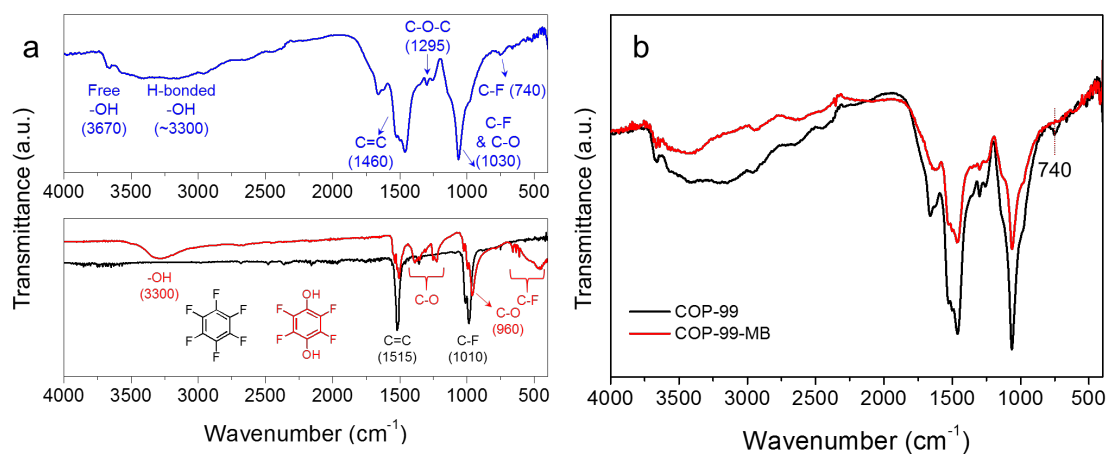

**Supplementary figure 4 | Characterisation by FTIR. (a)** FTIR spectra of COP-99 and related monomer units. **(b)** Change in FTIR spectrum after the adsorption of MB molecule.

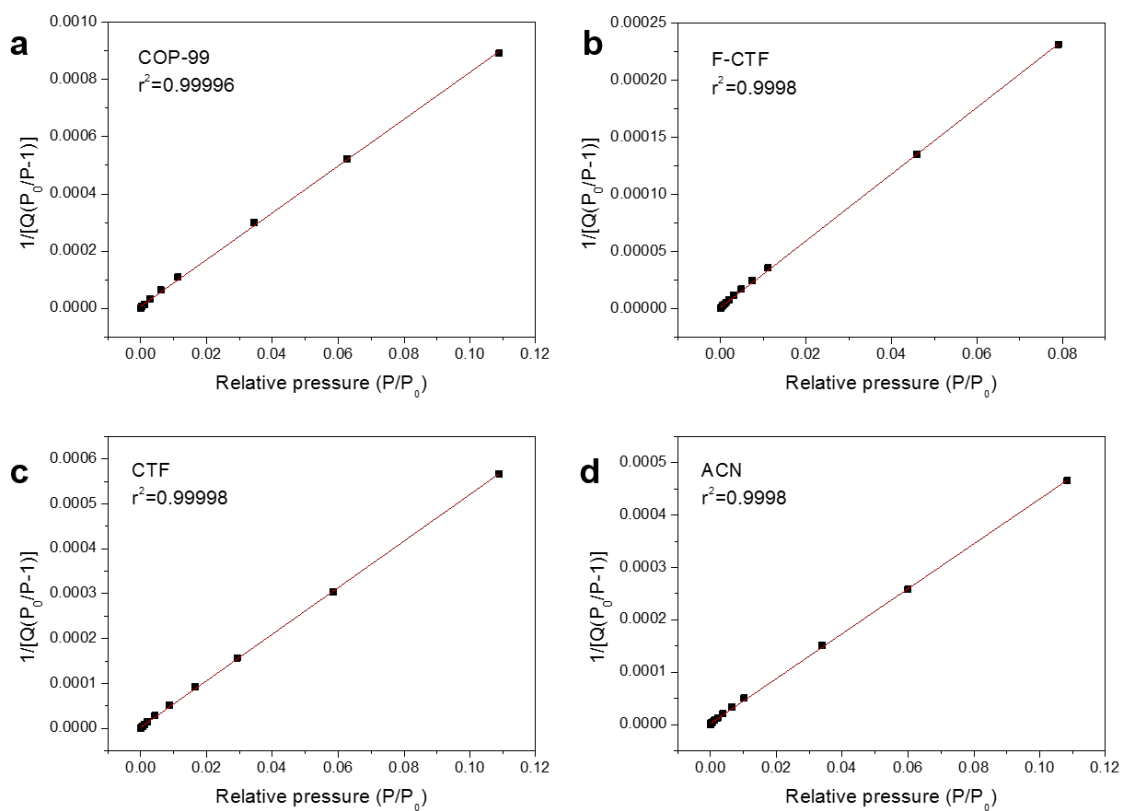

**Supplementary figure 5 | BET linear plots of (a) COP-99, (b) F-CTF, (c) CTF, and (d) ACN.**

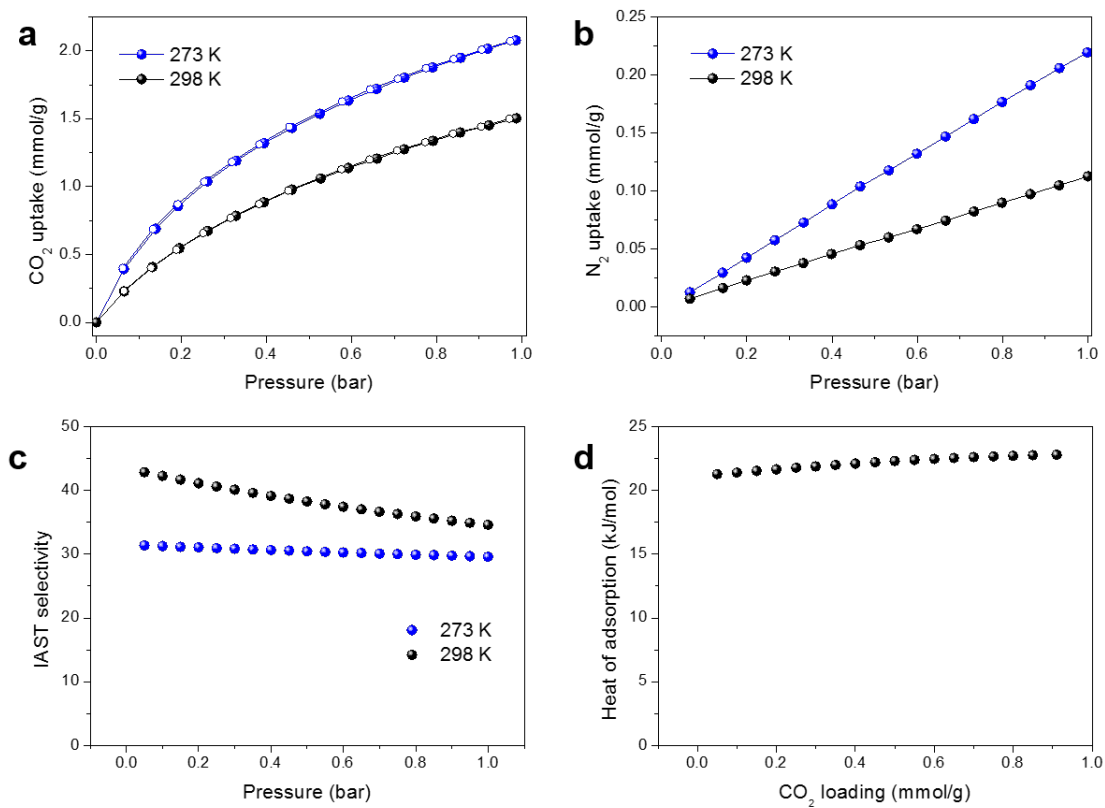

**Supplementary figure 6 | Gas adsorption isotherms of COP-99; (a) CO<sub>2</sub> and (b) N<sub>2</sub> at 273 K and 298 K. (c) IAST CO<sub>2</sub>/N<sub>2</sub> selectivity for CO<sub>2</sub>:N<sub>2</sub> gas mixture (15:85). (d) Isothermic heat of CO<sub>2</sub> adsorption for COP-99.**

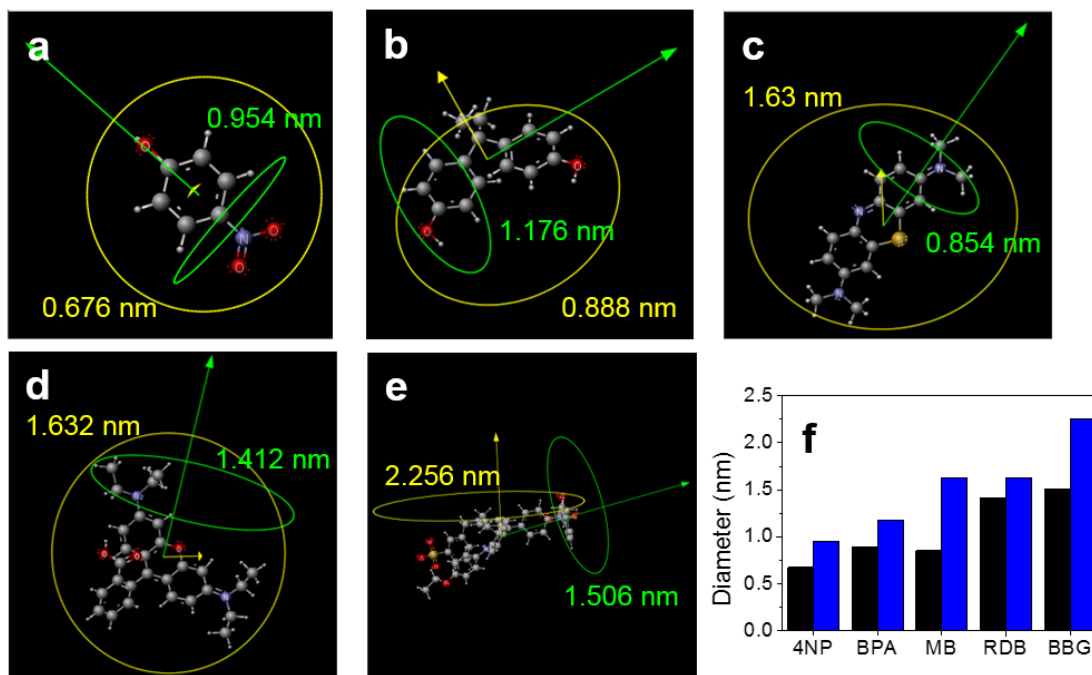

**Supplementary figure 7 | Visualization of minimum (green) and maximum (yellow) projection diameter of dye molecules utilized for adsorption study; (a) 4-Nitrophenol (4NP), (b) Bisphenol A (BPA), (c) Methylene Blue (MB), (d) Rhodamine B (RDB), and (e) Brilliant Blue G (BBG). Arrows represent the orthogonal directions on the projection planes. (f) Calculated  $d_{\min}$  (black) and  $d_{\max}$  (blue) for dye molecules. The calculations were carried out using *MarvinSketch*, *ChemAxon* (version 15.6.8), for the molecular conformation with the lowest energy based on van der Waals diameter of the atoms. (Projection optimization enabled, optimization limit: very strict).**

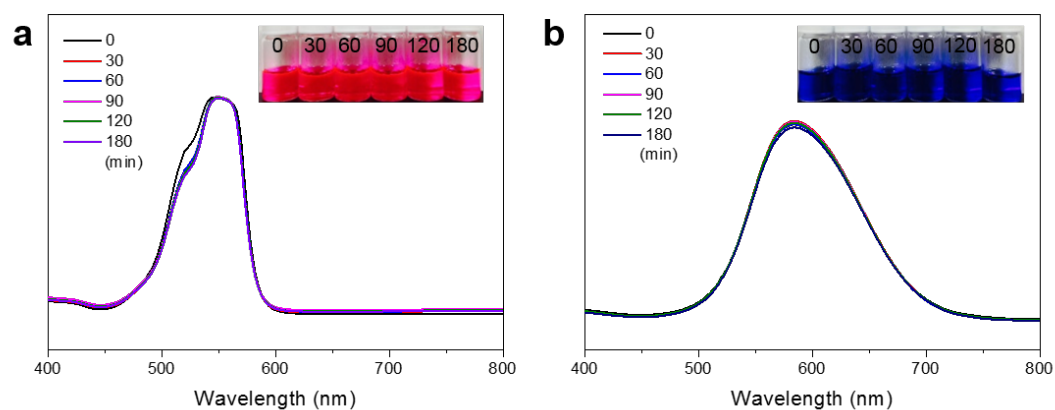

**Supplementary figure 8 | UV-Vis absorption spectra of (a) aqueous RDB and (b) BBG treated with COP-99 at different intervals. The inset photograph shows the corresponding colour of the effluents after the treatment.**



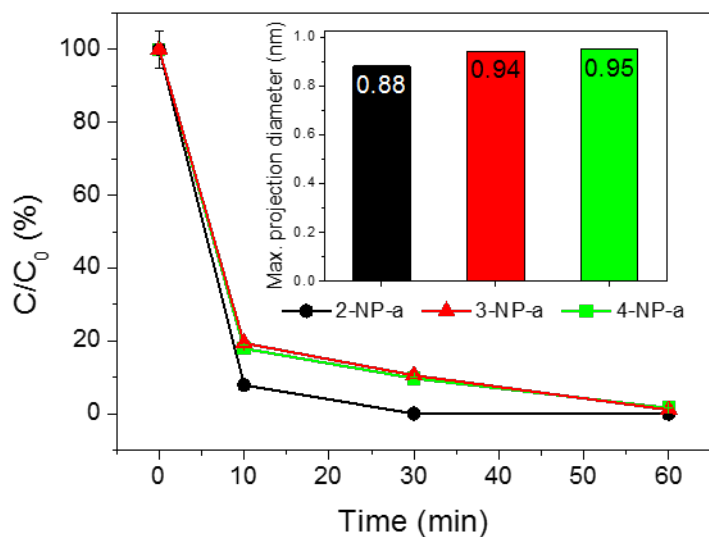

**Supplementary figure 9 | Change in NP isomer concentrations over time** after being treated with COP-99 in terms of absorbance relative to initial absorbance ( $C/C_0$ ). Initial concentration ( $C_0$ ) of all the dyes was adjusted to be 100  $\mu\text{M}$ , and the adsorption was conducted in mild acid condition (pH  $\sim$ 3.8). Inset displays the maximum van der Waals diameter of NP isomers calculated by *MarvinSketch*.

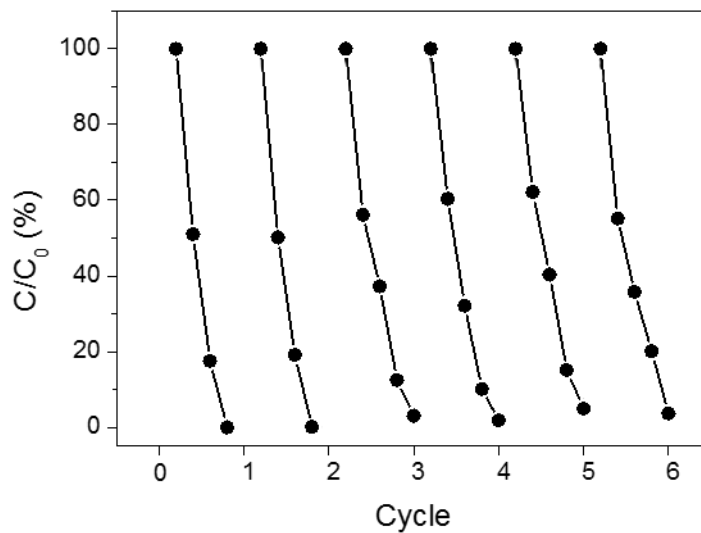

**Supplementary figure 10 | Removal efficiency of 4-NP-a on COP-99 in six successive cycles of adsorption-desorption.** Initial concentration of 4-NP-a was adjusted to be 50  $\mu\text{M}$  and pH of all the samples was controlled to be 4.

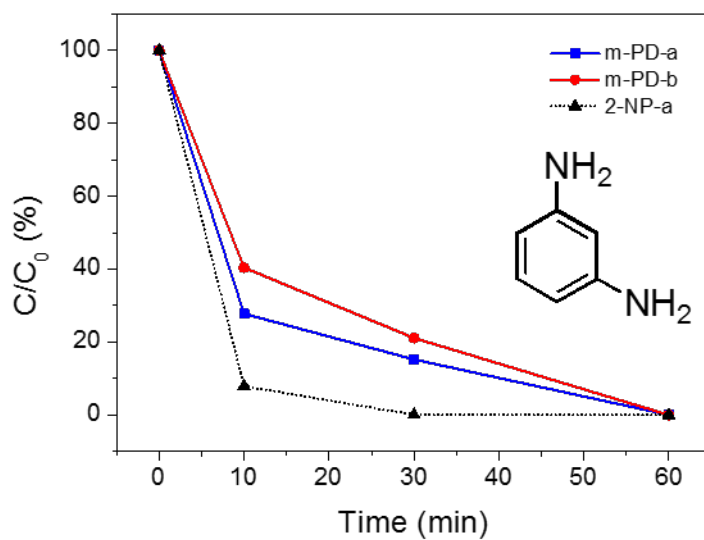

**Supplementary figure 11 | Change in m-PD concentrations over time** after being treated with COP-99 in terms of absorbance relative to initial absorbance ( $C/C_0$ ). Initial concentration ( $C_0$ ) of all the dyes was adjusted to be 100  $\mu\text{M}$ . The m-PD was tested both in acidic (m-PD-a, pH = 4) and basic (m-PD-b, pH = 10) conditions. The concentration was analysed using a UV-vis spectrophotometer at a wavelength of maximum absorbance (270 nm for m-PD-a and 220 nm for m-PD-b)<sup>10</sup>. *Inset* shows molecular structure of m-PD.

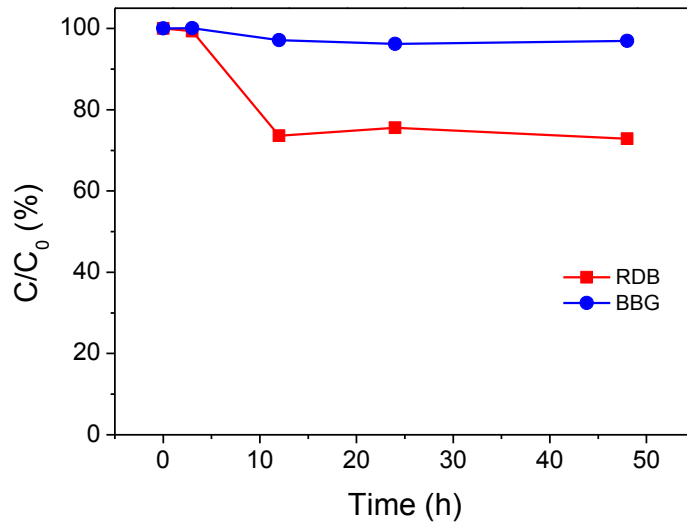

**Supplementary figure 12 | Long-term adsorption test of RDB and BBG using COP-99.** Initial concentration ( $C_0$ ) of all the dyes was adjusted to be 50  $\mu\text{M}$ .

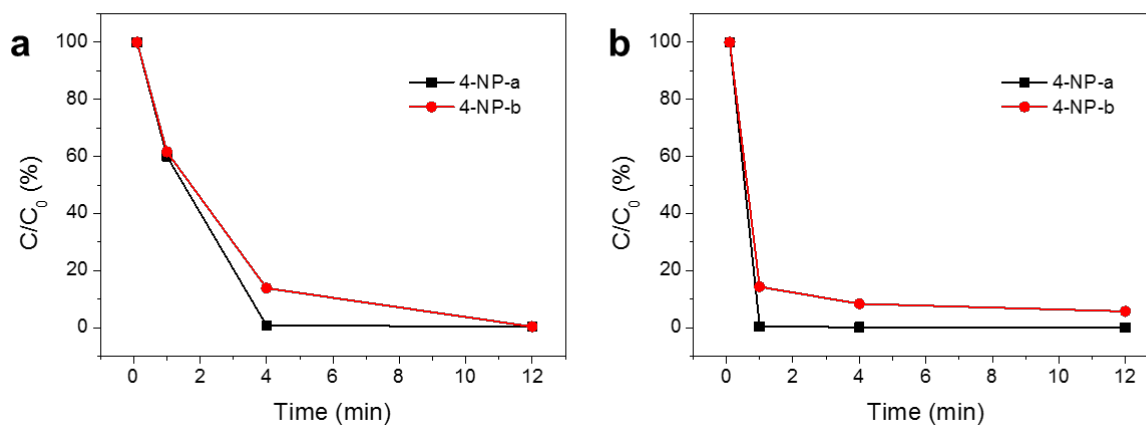

**Supplementary figure 13 | Change in 4-NP concentrations over time** after being treated with (a) CTF and (b) F-CTF in terms of absorbance relative to initial absorbance ( $C/C_0$ ). Initial concentration ( $C_0$ ) of the dyes was adjusted to be 50  $\mu\text{M}$ . 4-Nitrophenol was tested both in acidic (4NP-a, pH = 4) and basic (4NP-b, pH = 9) conditions.

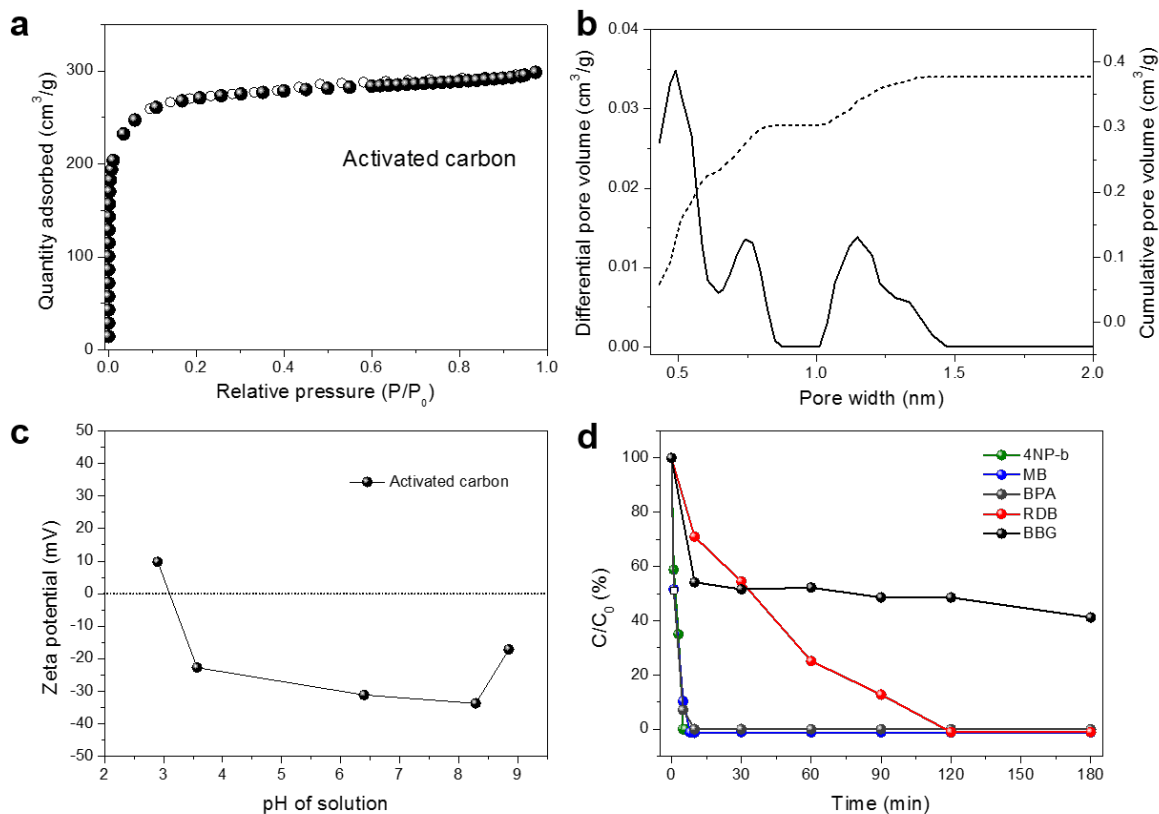

**Supplementary figure 14 | Control experiments with activated carbon.** (a) Argon adsorption-desorption isotherm of Activated Charcoal Norit® (ACN) measured at 87 K, and (b) corresponding NLDFT pore size distribution. (c) pH-dependent zeta potential of ACN. (d) Change in dye concentrations over time after being treated with ACN in terms of absorbance relative to initial absorbance ( $C/C_0$ ). Initial concentration ( $C_0$ ) of all the dyes was adjusted to be 50  $\mu\text{M}$ .

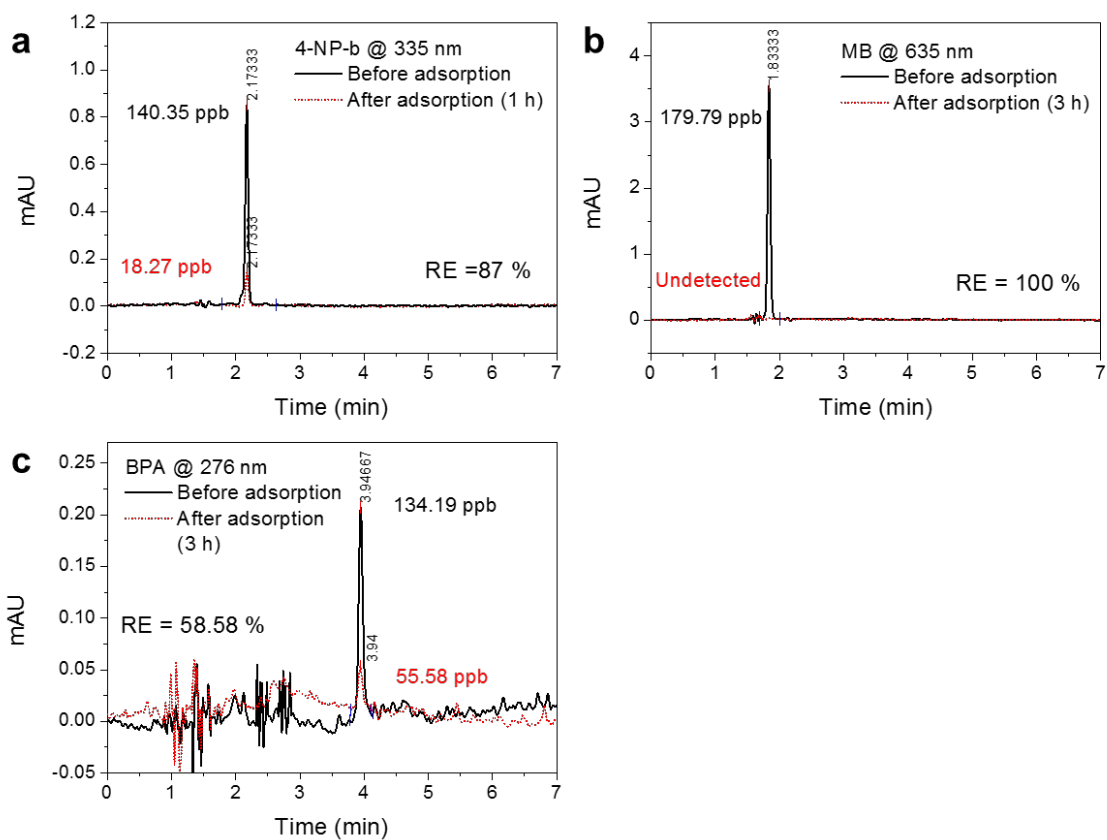

**Supplementary figure 15 | LC spectra of (a) 4-NP-b, (b) MB and (c) BPA before and after the treatment with COP-99. RE stands for removal efficiency via the adsorption with COP-99.**

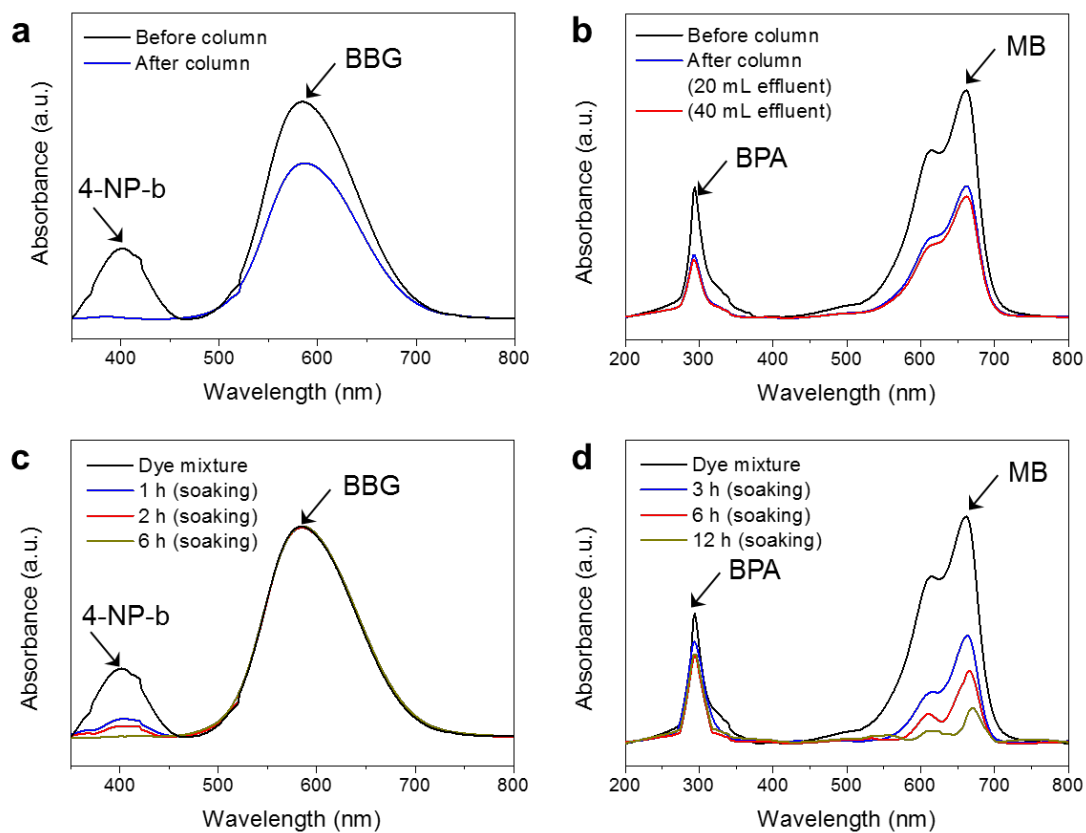

**Supplementary figure 16 | UV-Vis spectra of mixed dye solutions of (a,c) 4-NP/BBG and (b,d) MB/BPA (a, b) before and after being treated via a packed column of COP-99 and (c, d) during soaking COP-99 in the solutions.**



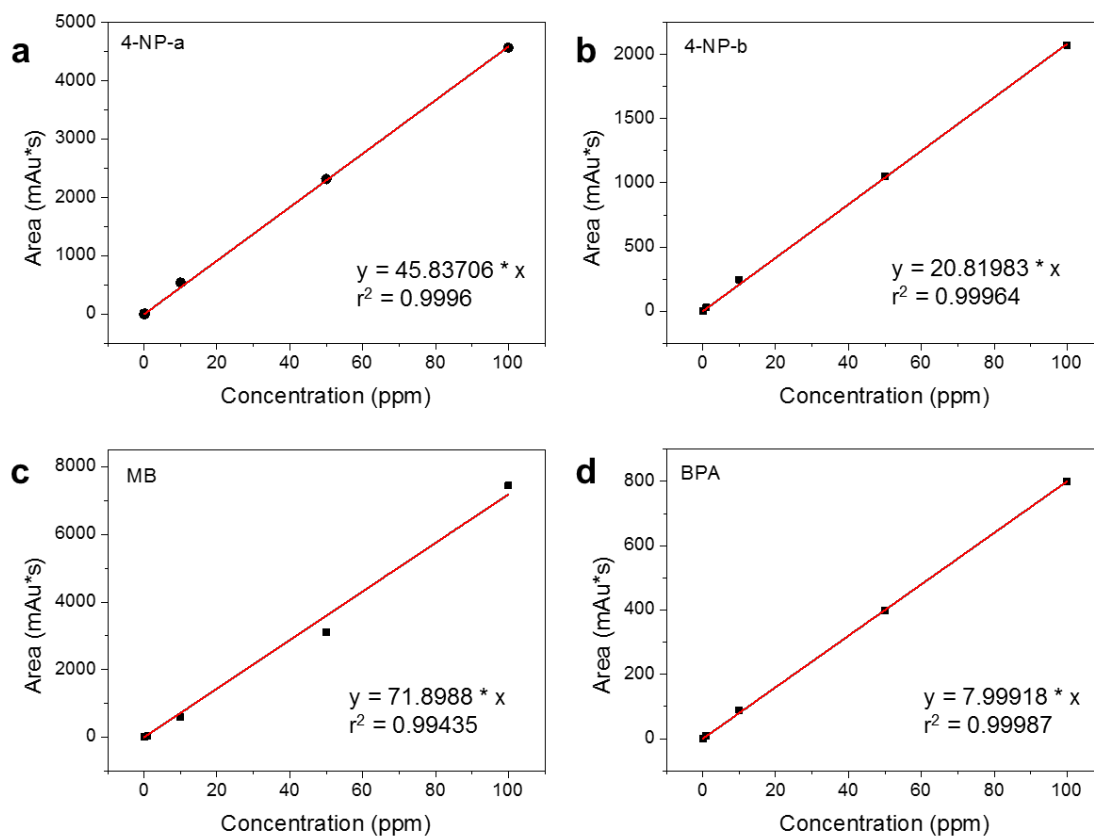

**Supplementary figure 17 | HPLC calibration curves of the tested dye substrates** from five concentrations of 0.05 ppm, 0.1 ppm, 10 ppm, 50 ppm, and 100 ppm. **(a)** 4-NP-a, **(b)** 4-NP-b, **(c)** MB, and **(d)** BPA.

**Supplementary table 1 | Elemental analyses of all porous polymers.** Fluorine contents were quantitatively measured by Combustion Ion Chromatography (CIC).

|        | Element      | C     | N     | H    | O     | F     |
|--------|--------------|-------|-------|------|-------|-------|
| COP-99 | Expected (%) | 47.08 | -     | -    | 15.68 | 37.24 |
|        | Found (%)    | 50.05 | 0.92  | 0.87 | 26.73 | 21.51 |
| F-CTF  | Expected (%) | 48.02 | 14.00 | -    | -     | 37.98 |
|        | Found (%)    | 60.16 | 21.26 | 2.82 | -     | 15.82 |
| CTF    | Expected (%) | 74.99 | 21.86 | 3.15 | -     | -     |
|        | Found (%)    | 67.49 | 17.93 | 2.38 | 6.7   | -     |

**Supplementary note 1.** Long-term boiling test of COP-99 was carried out under hydrothermal condition. In order to prevent from the possible evaporation of D<sub>2</sub>O under the elevated temperature, we carried out the test in closed glass ampoule. Typically, about 20 mg of COP-99 was placed in a Pyrex ampoule (5 mL capacity) and 1.5 mL of D<sub>2</sub>O was transferred in the ampoule. The reaction mixture was frozen in liquid nitrogen, further evacuated and flame-sealed. After being warmed, the ampoule was treated at 110°C for 24h, and the reaction filtrate was analysed using NMR spectroscopy.

We observed that COP-99 did not exhibit any colour change and the D<sub>2</sub>O filtrate also stayed transparent after the hydrothermal treatment (Supplementary Fig. 2d). The <sup>1</sup>H NMR spectrum of the D<sub>2</sub>O filtrate only showed a D<sub>2</sub>O residual peak, and the <sup>13</sup>C NMR spectrum also displayed no peaks, indicating the COP-99 is insoluble in water even at a boiling condition (Supplementary Fig. 2e and 2f, respectively). In the <sup>19</sup>F NMR spectrum (Supplementary Fig. 2g), however, showed a small peak at about -130.27 ppm, corresponding to aqueous F<sup>-</sup> ions (e.g. Aqueous F<sup>-</sup> of KF = -125.3 ppm). This implies that few fluorines on COP-99 were detached from the polymer network at the elevated temperature, and we assumed that D<sub>2</sub>O replaces fluorines to produce deuterium fluoride in high temperature via nucleophilic substitution. When COP-99 was treated under lower temperature, i.e., 50 °C for 60 h, there were no peaks in <sup>1</sup>H, <sup>13</sup>C, <sup>19</sup>F NMR spectrum in the D<sub>2</sub>O filtrate (Supplementary Fig. 2h). We found that the fluorine content has been decreased 4.6 % after the boiling test at 110 °C (only 20 % of all fluorines) due to the fluorine exchange with D<sub>2</sub>O, however, there was no noticeable change in fluorine content after the treatment at 50 °C. This indicates that the nucleophilic substitution of fluorines is plausible (albeit minor) under boiling condition, but the COP-99 was stable in water at least up to 50 °C with no change in the amount of fluorines and its framework is stable even at high temperature and pressures. Therefore, COP-99 should be safe to be utilized in water treatment application owing to its stability and insolubility in water.

**Supplementary note 2.** The CO<sub>2</sub> and N<sub>2</sub> uptakes of the COP-99 were carried out at 273 K and 298 K (Supplementary Fig. 6a and 6b). The CO<sub>2</sub> isotherms of COP-99 show physisorptive binding motion with good reversibility. The CO<sub>2</sub> adsorption capacity of COP-99 at 1 bar is 2.14 mmol g<sup>-1</sup> at 273 K and 1.55 mmol g<sup>-1</sup> at 298 K, showing noticeable capacity retention with rising temperature. The CO<sub>2</sub> uptake of COP-99 under the high temperature is highly comparable to fluorinated porous polymers with much higher BET surface area, such as FPOP (2.2 mmol g<sup>-1</sup> at 273 K, surface area = 1170 m<sup>2</sup> g<sup>-1</sup>)<sup>5</sup> and FMOP (1.68 mmol g<sup>-1</sup> at 298 K, surface area = 1018 m<sup>2</sup> g<sup>-1</sup>)<sup>6</sup>, which may be originated from the high fluorine content and narrower pore of COP-99 facilitating CO<sub>2</sub> adsorption<sup>3,7</sup>. The preferential CO<sub>2</sub> binding capability of COP-99 was evaluated by using an ideal adsorbed solution theory (IAST) for binary mixture composition of CO<sub>2</sub>:N<sub>2</sub> (15:85)<sup>8</sup>. The IAST CO<sub>2</sub> and N<sub>2</sub> selectivity was high as 29.6 at 273 K and 34.6 at 298 K, showing a slight enhancement in increasing temperature (Supplementary Fig. 6c). Such behaviour is due to CO<sub>2</sub> binding affinity toward the fluorinated COP-99 not weakening as much as the N<sub>2</sub> binding<sup>9</sup>. The isosteric heat (Q<sub>st</sub>) of COP-99 for CO<sub>2</sub> adsorption was 21.3 kJ mol<sup>-1</sup> at zero coverage (Supplementary Fig. 6d), indicating that COP-99 can be easily regenerated via pressure/vacuum swing adsorption technique.

**Supplementary note 3.** Along with 4-NP/BBG mixture shown in Fig. 7b, mixture of MB and BPA having similar molecular size was also tested for column separation and batch adsorption. When MB/BPA mixture was filtered through the COP-99 column, both molecules exhibited concentration decrease in a similar level, showing the removal efficiency of 47 % and 55.4 % for MB and BPA, respectively (Supplementary Fig. 16b). We believe this is originated from the column packing condition as we have seen the separation test result from 4-NP/BBG mixture. The size-dependent separation was dominant than the charge-based separation when the mixed molecules pass through a densely packed column, and MB and BPA having almost similar molecular size were filtered out at the same time. While there was no selective adsorption in the column separation, COP-99 showed charge-selective uptake of MB out of the MB/BPA dye mixture via batch adsorption. After immersing 8 mg of COP-99 in the 8 mL of MB/BPA mixed solution for 12 h, MB was removed up to 87 % and BPA was adsorbed 22 %, indicating the fluorine-charge interaction facilitates selective adsorption of MB from the mixed solution (Supplementary Fig. 16d).

## Supplementary references

1. Budd PM, *et al.* Solution-processed, organophilic membrane derived from a polymer of intrinsic microporosity. *Adv. Mater.* **16**, 456-459 (2004).
2. Kuhn P, Antonietti M, Thomas A. Porous, covalent triazine-based frameworks prepared by ionothermal synthesis. *Angew. Chem. Int. Ed.* **47**, 3450-3453 (2008).
3. Zhao YF, Yao KX, Teng BY, Zhang T, Han Y. A perfluorinated covalent triazine-based framework for highly selective and water-tolerant CO<sub>2</sub> capture. *Energy Environ. Sci.* **6**, 3684-3692 (2013).
4. Clark T, Hennemann M, Murray J, Politzer P. Halogen bonding: the  $\sigma$ -hole. *J. Mol. Model.* **13**, 291-296 (2007).
5. Liu DP, Chen Q, Zhao YC, Zhang LM, Qi AD, Han BH. Fluorinated Porous Organic Polymers via Direct C-H Arylation Polycondensation. *ACS Macro Lett.* **2**, 522-526 (2013).
6. Yang ZZ, *et al.* Fluorinated microporous organic polymers: design and applications in CO<sub>2</sub> adsorption and conversion. *Chem. Commun.* **50**, 13910-13913 (2014).
7. Li GY, Zhang B, Yan J, Wang ZG. The directing effect of linking units on building microporous architecture in tetraphenyladamantane-based poly(Schiff base) networks. *Chem. Commun.* **50**, 1897-1899 (2014).
8. Myers AL, Prausnitz JM. Thermodynamics of mixed-gas adsorption. *AIChE J.* **11**, 121-127 (1965).
9. Patel HA, Ko D, Yavuz CT. Nanoporous Benzoxazole Networks by Silylated Monomers, Their Exceptional Thermal Stability, and Carbon Dioxide Capture Capacity. *Chem. Mater.* **26**, 6729-6733 (2014).
10. Baranowska I, Pieszko C, Raróg D, Pielesz A. Analysis of some aromatic amines by means of derivative spectrophotometry. *J. Environ. Sci. Heal. A* **37**, 1841-1848 (2002).
